# Supplementary material for: Novel and Simple Method for Quantification of 2,4,6-Trichlorophenol with Microbial Conversion to 2,4,6-Trichloroanisole
Source: MDPI journal article supplement (doi:10.3390/microorganisms11092133), 2023-08-23
Supplement: s1 [file s1]

## Supplementary Materials

**Table S1 Detailed information on the fungi obtained in this study.**

| No.      | Sample origin |          | Appearance                    |                      | 2,4,6-TCA<br>productivity<br>* | Sequence of ITS region     |                                |
|----------|---------------|----------|-------------------------------|----------------------|--------------------------------|----------------------------|--------------------------------|
|          | dates         | Location | Colony Color                  | filamentous<br>fungi |                                | Identified genus           | Registered<br>accession<br>no. |
| 0521-K05 | 21-May-2021   | T1       | Yellow and<br>white           | +                    | -                              | <i>Aspergillus</i>         | OQ657949                       |
| 0521-K08 | 21-May-2021   | T1       | Light brown                   | -                    | -                              | <i>Cutaneotrichosporon</i> | OQ657950                       |
| 0521-K09 | 21-May-2021   | T1       | White                         | +                    | -                              | <i>Geotrichum</i>          | OQ657951                       |
| 0521-K11 | 21-May-2021   | T1       | White                         | -                    | -                              | <i>Apiotrichum</i>         | OQ657952                       |
| 0521-K13 | 21-May-2021   | T1       | Pink                          | -                    | -                              | <i>Rhodotorula</i>         | OQ657953                       |
| 0521-K14 | 21-May-2021   | T1       | Brown, sky<br>blue and white  | +                    | ++                             | <i>Penicillium</i>         | OQ657954                       |
| 0521-K15 | 21-May-2021   | T1       | White                         | +                    | -                              | <i>Apiotrichum</i>         | OQ657955                       |
| 0521-K16 | 21-May-2021   | T1       | White                         | +                    | ++                             | <i>Trametes</i>            | OQ657956                       |
| 0521-K17 | 21-May-2021   | T1       | White                         | +                    | -                              | <i>Trametes</i>            | OQ657957                       |
| 0623-K03 | 20-Jun-2021   | T2       | White                         | -                    | -                              | <i>Candida</i>             | OQ657958                       |
| 0623-K04 | 20-Jun-2021   | T2       | Pale orange                   | -                    | -                              | <i>Trichosporon</i>        | OQ657959                       |
| 0623-K05 | 20-Jun-2021   | T2       | Pink                          | -                    | -                              | <i>Rhodotorula</i>         | OQ657960                       |
| 0623-K08 | 20-Jun-2021   | T2       | Dark green                    | +                    | -                              | <i>Cladosporium</i>        | OQ657961                       |
| 0729-K06 | 28-Jul-2021   | T2       | White                         | +                    | -                              | <i>Trametes</i>            | OQ657962                       |
| 0729-K12 | 28-Jul-2021   | T2       | Pink                          | -                    | -                              | <i>Rhodotorula</i>         | OQ657963                       |
| 0928-K02 | 28-Sep-2021   | T3       | Pale orange                   | -                    | -                              | <i>Cutaneotrichosporon</i> | OQ657964                       |
| 0928-K03 | 28-Sep-2021   | T3       | Yellow green<br>and white     | +                    | ++                             | <i>Trichoderma</i>         | OQ657965                       |
| 0928-K04 | 28-Sep-2021   | T3       | Light brown<br>and light blue | +                    | ++                             | <i>Penicillium</i>         | OQ657966                       |
| 0928-K06 | 28-Sep-2021   | T3       | Pale orange                   | -                    | +                              | <i>Apiotrichum</i>         | OQ657967                       |
| 0928-K07 | 28-Sep-2021   | T3       | Yellow                        | +                    | +                              | <i>Aspergillus</i>         | OQ657968                       |
| 0928-K08 | 28-Sep-2021   | T3       | Bright yellow                 | +                    | +                              | <i>Aspergillus</i>         | OQ657969                       |
| 0928-K09 | 28-Sep-2021   | T3       | White                         | +                    | ++                             | <i>Trichoderma</i>         | OQ657970                       |
| 0928-K11 | 28-Sep-2021   | T3       | Dark red                      | +                    | -                              | <i>Talaromyces</i>         | OQ657971                       |

|          |             |    |                                 |   |    |                      |          |
|----------|-------------|----|---------------------------------|---|----|----------------------|----------|
| 0928-K12 | 28-Sep-2021 | T3 | Light yellow,<br>pink and white | + | -  | <i>Penicillium</i>   | OQ657972 |
| 1018-K01 | 18-Oct-2021 | B1 | Yellow green                    | + | +  | <i>Cladosporium</i>  | OQ657973 |
| 1018-K02 | 18-Oct-2021 | B1 | Dark green and<br>white         | + | -  | <i>Cladosporium</i>  | OQ657974 |
| 1116-K02 | 16-Nov-2021 | R1 | Pale pink                       | - | -  | <i>Naganishia</i>    | OQ657975 |
| 1116-K03 | 16-Nov-2021 | R1 | White                           | - | -  | <i>Hanseniaspora</i> | OQ657976 |
| 1116-K04 | 16-Nov-2021 | R1 | Orange                          | + | ++ | <i>Talaromyces</i>   | OQ657977 |
| 1122-K01 | 20-Nov-2021 | R2 | Yellow green<br>and white       | + | ++ | <i>Trichoderma</i>   | OQ657978 |
| 1126-K01 | 26-Nov-2021 | B2 | Pale orange                     | - | -  | <i>Naganishia</i>    | OQ657979 |
| 1126-K02 | 26-Nov-2021 | B2 | Dark pink                       | - | -  | <i>Rhodotorula</i>   | OQ657980 |

---

\*: TCA productivity in the table was shown as negative (-) for strains with no confirmed TCA productivity, positive (+) for strains with confirmed TCA productivity, and positive plus (++) for strains with relatively high TCA productivity.

**Table S2 Detailed information on the bacteria obtained in this study.**

| No.      | Sample origin |          | Colony<br>Color       | 2,4,6-TCA<br>productivity* | 16S rRNA sequence        |                                |
|----------|---------------|----------|-----------------------|----------------------------|--------------------------|--------------------------------|
|          | dates         | Location |                       |                            | Identified genus         | Registered<br>accession<br>no. |
| 1018-S01 | 18-Oct-2021   | B1       | Dark yellow           | ++                         | <i>Sphingomonas</i>      | OQ651227                       |
| 1018-S02 | 18-Oct-2021   | B1       | Pale yellow           | -                          | <i>Micrococcus</i>       | OQ651203                       |
| 1018-S03 | 18-Oct-2021   | B1       | White                 | ++                         | <i>Mycolicibacterium</i> | OQ651228                       |
| 1018-S04 | 18-Oct-2021   | B1       | White                 | ++                         | <i>Mycolicibacterium</i> | OQ651229                       |
| 1018-S05 | 18-Oct-2021   | B1       | Transparent           | -                          | <i>Pelomonas</i>         | OQ651230                       |
| 1116-S01 | 16-Nov-2021   | R1       | White                 | +                          | <i>Acinetobacter</i>     | OQ651204                       |
| 1116-S03 | 16-Nov-2021   | R1       | White                 | -                          | <i>Flavobacterium</i>    | OQ651205                       |
| 1116-S04 | 16-Nov-2021   | R1       | Yellow                | -                          | <i>Sphingomonas</i>      | OQ651206                       |
| 1116-S05 | 16-Nov-2021   | R1       | Ocher                 | -                          | <i>Flavobacterium</i>    | OQ651207                       |
| 1116-S06 | 16-Nov-2021   | R1       | White                 | -                          | <i>Bacillus</i>          | OQ651208                       |
| 1116-S07 | 16-Nov-2021   | R1       | Orange                | -                          | <i>Exiguobacterium</i>   | OQ651209                       |
| 1116-S08 | 16-Nov-2021   | R1       | Transparent<br>orange | -                          | <i>Rheinheimera</i>      | OQ651210                       |
| 1116-S09 | 16-Nov-2021   | R1       | White                 | -                          | <i>Yersinia</i>          | OQ651211                       |
| 1116-S13 | 16-Nov-2021   | R1       | Ocher                 | -                          | <i>Sphingomonas</i>      | OQ651212                       |
| 1122-S01 | 20-Nov-2021   | R2       | Translucent<br>white  | -                          | <i>Pseudomonas</i>       | OQ651213                       |
| 1122-S02 | 20-Nov-2021   | R2       | Pale yellow           | -                          | <i>Chryseobacterium</i>  | OQ651214                       |
| 1126-S02 | 26-Nov-2021   | B2       | White                 | -                          | <i>Acinetobacter</i>     | OQ651215                       |
| 1126-S03 | 26-Nov-2021   | B2       | Pink                  | -                          | <i>Acinetobacter</i>     | OQ651216                       |
| 1126-S04 | 26-Nov-2021   | B2       | Dark orange           | -                          | <i>Sphingomonas</i>      | OQ651217                       |
| 1126-S05 | 26-Nov-2021   | B2       | Dark yellow           | -                          | <i>Sphingomonas</i>      | OQ651218                       |
| 1126-S06 | 26-Nov-2021   | B2       | Clear white           | -                          | <i>Mitsuaria</i>         | OQ651219                       |
| 1126-S07 | 26-Nov-2021   | B2       | Orange                | -                          | <i>Pseudomonas</i>       | OQ651220                       |
| 0524-S01 | 16-May-2022   | B3       | White                 | ++                         | <i>Mycolicibacterium</i> | OQ651221                       |
| 0524-S02 | 16-May-2022   | B3       | Yellow                | -                          | <i>Staphylococcus</i>    | OQ651231                       |
| 0524-S05 | 16-May-2022   | B3       | White                 | ++                         | <i>Mycobacterium</i>     | OQ651232                       |
| 0524-S08 | 16-May-2022   | B4       | Red                   | -                          | <i>Methylobacterium</i>  | OQ651222                       |
| 0524-S14 | 16-May-2022   | B4       | White                 | ++                         | <i>Mycolicibacterium</i> | OQ651233                       |

|          |             |    |            |    |                          |          |
|----------|-------------|----|------------|----|--------------------------|----------|
| 0704-S19 | 26-Jun-2022 | B5 | Orange     | +  | <i>Mycolicibacterium</i> | OQ651234 |
| 0704-S20 | 26-Jun-2022 | B5 | White      | ++ | <i>Mycolicibacterium</i> | OQ651223 |
| 0704-S22 | 26-Jun-2022 | B5 | White      | ++ | <i>Mycolicibacterium</i> | OQ651235 |
| 0704-S23 | 26-Jun-2022 | B5 | Red orange | ++ | <i>Mycolicibacterium</i> | OQ651236 |
| 0704-S24 | 26-Jun-2022 | B5 | Orange     | ++ | <i>Mycolicibacterium</i> | OQ651237 |
| 0704-S28 | 26-Jun-2022 | B5 | White      | ++ | <i>Mycolicibacterium</i> | OQ651238 |
| 0704-S32 | 26-Jun-2022 | B5 | Orange     | +  | <i>Mycolicibacterium</i> | OQ651239 |
| 0704-S34 | 26-Jun-2022 | B5 | White      | ++ | <i>Mycolicibacterium</i> | OQ651240 |

---

\*: TCA productivity in the table were shown as negative (-) for strains with no confirmed TCA productivity, positive (+) for strains with confirmed TCA productivity, and positive plus (++) for strains with relatively high TCA productivity.

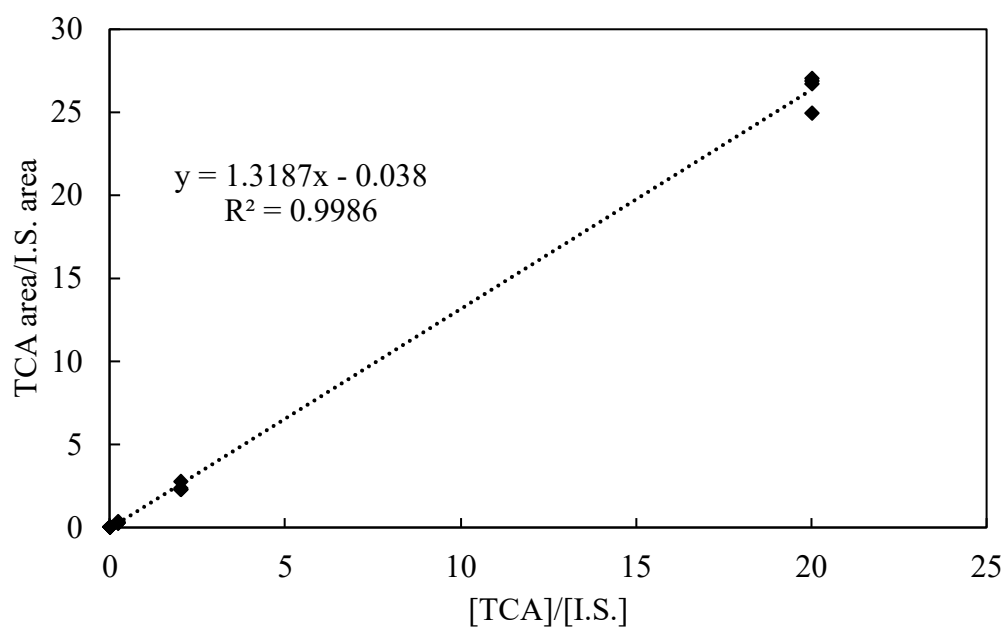

**Figure S1 GC-MS calibration curve for TCA.**

The calibration was obtained from the measured peak area of TCA vs. TCA concentration in the vial bottle. The peak area and the concentration in the figure were relative values to those of *p*-iodoanisole as internal standard.

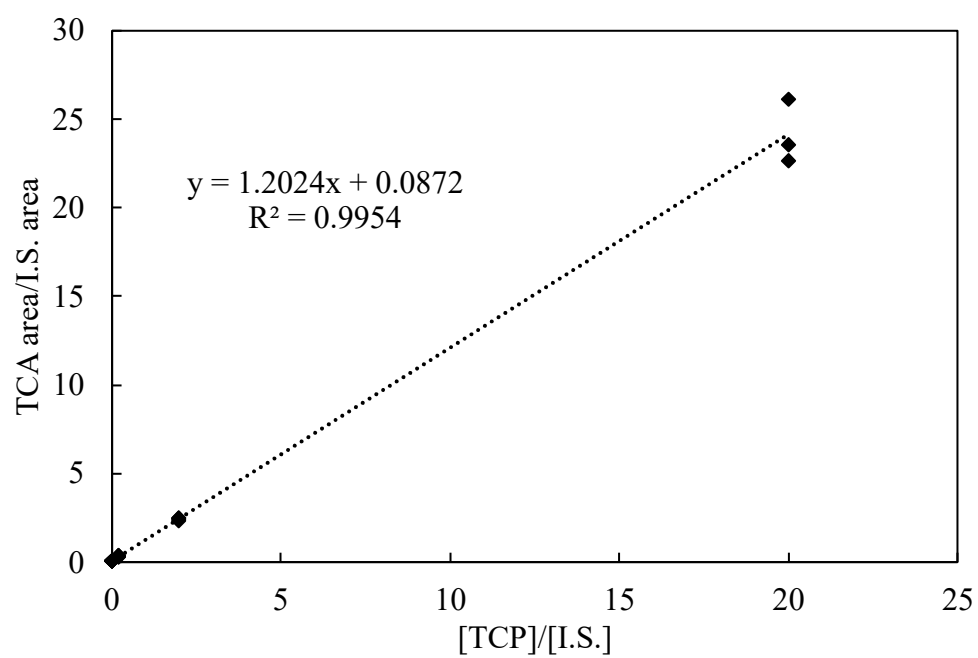

**Figure S2 GC-MS calibration curve for TCP.**

The calibration was obtained from the measured peak area of TCA vs. TCP concentration added in the vial bottle before biological conversion. The peak area and the concentration in the figure were relative values to those of *p*-iodoanisole as internal standard.

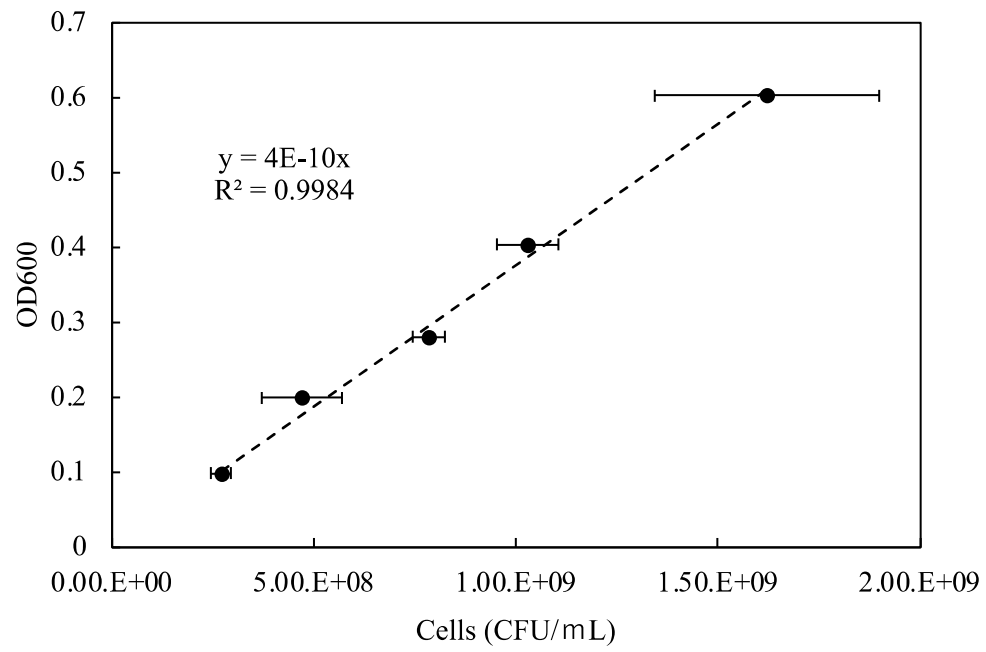

**Figure S3 The correlation between colony numbers and the turbidity of the culture medium.**
